# Supplementary material for: Assembly of CdS nanoparticles on boron and fluoride co-doped TiO2 nanofilm for solar energy conversion applications
Source: Royal Society of Chemistry journal article supplement (doi:10.1039/c7ra03071a), 2017-01-01
Supplement: c7ra03071a1.pdf [file c7ra03071a1.pdf]

## Supporting Information

### Assembly of CdS nanoparticles on boron and fluoride co-doped TiO<sub>2</sub> nanofilm for solar energy conversion applications

Qi Lu<sup>a</sup>, Ling Li<sup>\*a</sup>, Junying Xiao<sup>a</sup>, Huidong Sui<sup>a</sup>, Jianwei Li<sup>a</sup>, RuyueDuan<sup>a</sup>, Jingbo Li<sup>a</sup>, Wenming Zhang<sup>\*a</sup>, Xiaowei Li<sup>a</sup>, Kunyang<sup>a</sup>, Yucang Zhang<sup>b\*</sup>, MingxingWu<sup>a,c\*</sup>

a. Hebei Key Lab of Optic-electronic Information and Materials, College of Physics Science and Technology, Hebei University, Baoding 071002, P. R. China.

b. Key Laboratory of Ministry of Education for Advanced Materials in Tropical Island Resources in Hainan University, Haikou 570228, P. R. China

c. College of Chemistry and Material Science, Hebei Normal University, No. 20 Rd. East of 2nd Ring South, Yuhua District, Shijiazhuang City, Hebei Province, 050024, P. R. China

\*Corresponding author. Tel.: +86 312 5079355; Fax: +86 312 5079355.

E-mail addresses: lilinghbu@163.com, wmzhang@hbu.edu.cn, yczhang@hainu.edu.cn, mingxing.wu@mail.hebtu.edu.cn

#### 1. Results and Discussion

##### 1.1 XRD analysis

Fig. 1a confirms that the diffraction peaks of all samples are ascribed to the TiO<sub>2</sub> anatase phase ( $2\theta = 25.284^\circ$ ), Fig. 1b indicates that there has been virtually no phase change in TiO<sub>2</sub> in the process of codoping, regardless of the amounts of dopants. Furthermore, due to the small amount of B and F used for doping, no significant characteristic peak of boron oxide was found in B-F doped TiO<sub>2</sub>. In other words, the addition of a small amount of B and F did not change the structure of anatase TiO<sub>2</sub>.

##### 1.2 TEM analysis

The coverage of CdS QDs on B-F-TiO<sub>2</sub> film surface and well interconnected among the nanospheroidal particles was clearly demonstrated from TEM image (Fig. 2). TEM image verified that individual B-F-TiO<sub>2</sub> were covered with nanoparticle

aggregate with diameters about 10~15 nm. And it also shows that large aggregates of CdS cover the entrance of the B-F-TiO<sub>2</sub> film. However, the TEM image of the B-F-TiO<sub>2</sub>/TGA/CdS-3 film clearly displays that CdS QDs were abundantly deposited inside the B-F-TiO<sub>2</sub> film, which shows that a crystalline CdS QDs with the size ~6 nm was grown on an anatase B-F-TiO<sub>2</sub> film.

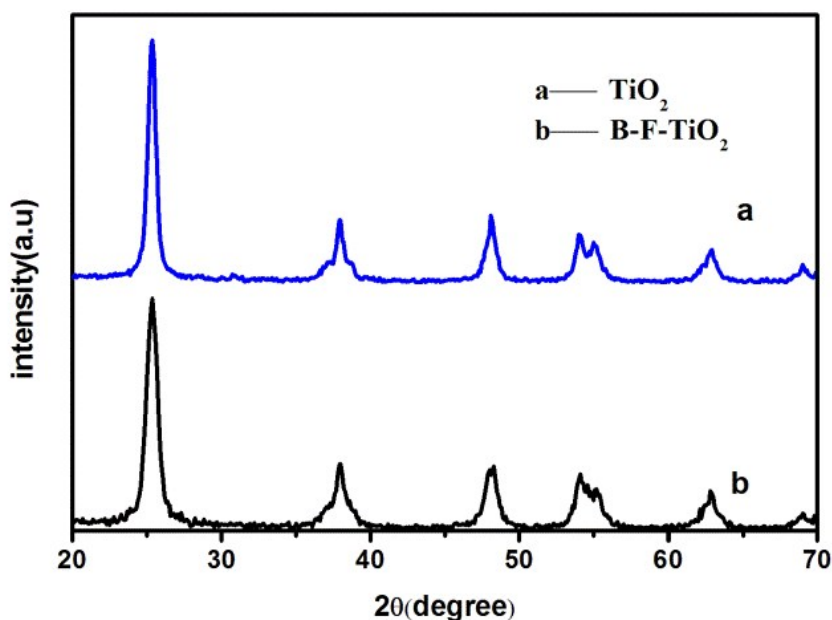

**Fig. 1** XRD patterns of the pure TiO<sub>2</sub> (curve a) and 0.5% B-F-doped TiO<sub>2</sub> (curve b).

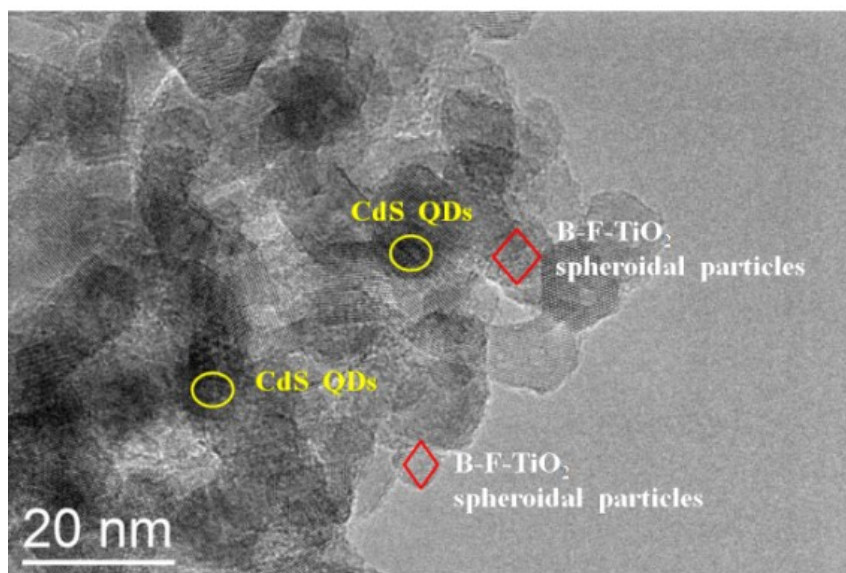

**Fig 2.** TEM image of CdS QD sensitized B/F co-doped TiO<sub>2</sub> film

### 1.3 EDS analysis

The EDS analysis of the B/F-doped TiO<sub>2</sub> was conducted with a scanning electron microscope. From Fig. 3, characteristic peaks corresponding to Ti and O elements

were observed, arising from the  $\text{TiO}_2$ . The small peak seen for B and F confirms the existence of B and F in the  $\text{TiO}_2$  substance, which suggests incorporation of B and F elements.

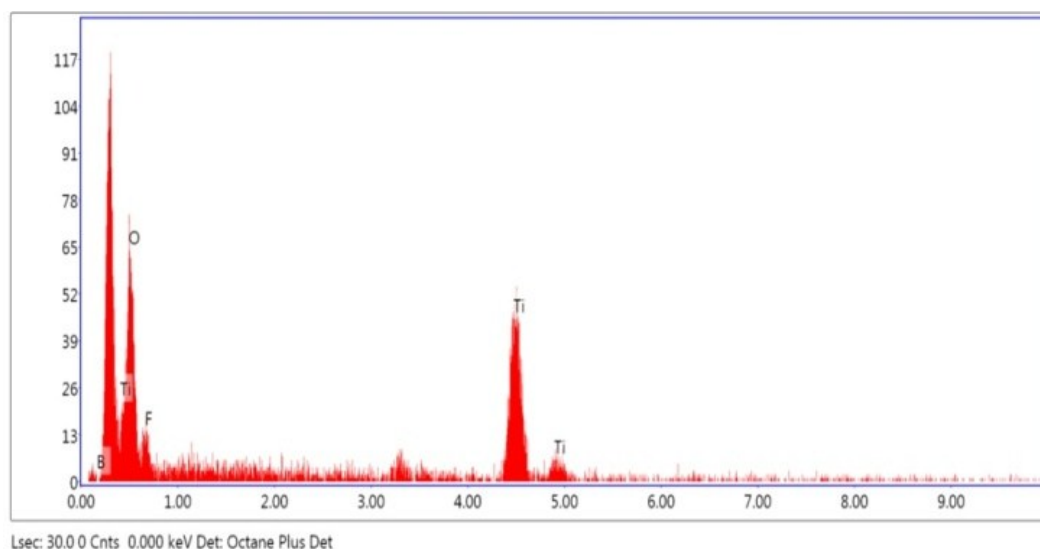

**Fig. 3.** SEM-EDS analysis of B/F-doped  $\text{TiO}_2$  electrode

#### 1.4 XPS analysis

The electronic structure and chemical environment of the elements on the surface were investigated by XPS spectra. We examined three areas, the Ti 2p region around 460 eV (Fig. 4b), and the O 1s region around 530 eV (Fig. 4b): the B 1s region around 193 eV (Fig. 4c), and the N 1s region around 397 eV (Fig. 4d). The nonmetal doping can introduce residual charge, which may result in an decrease in the number of surface O-H groups (which is evidenced by O1s XPS) and then an decrease in the crystallite size. Which was agreed with the XRD. In contrast, although the direct evidence is still absent, Chen et al.<sup>46</sup> proposed that the doped boron may reduce the surface energy of  $\text{TiO}_2$  nanoparticles, which may hinder the increase in the crystallite size. Probably different sample preparation procedures lead to the difference. It has been demonstrated that the B 1s XPS spectrum may be used to identify the boron species on the surfaces of the doped  $\text{TiO}_2$ <sup>47-53</sup>. As shown in Fig. 3c, the B1s XPS spectrum of the B-doped  $\text{TiO}_2$  exhibits the typical asymmetrical broad peak at 186.7 eV<sup>54</sup>, which may be deconvoluted (carried out by the XPSPEAK41 software package) may be ascribed to interstitial borons. The binding energy of B1s in  $\text{H}_3\text{BO}_3$  was 193.8 eV while in  $\text{TiB}_2$  was 188.2 eV, so here B1s 186.7 eV was between the

binding energy of  $\text{H}_3\text{BO}_3$  and  $\text{TiB}_2$ , so maybe some B replaced O, then formed B-Ti-O bond, this means that the B atom doped into the crystal lattice of  $\text{TiO}_2$ . The 2p orbital of B hybridized with the 2p orbital of O, then narrowed the band gap<sup>55</sup>.

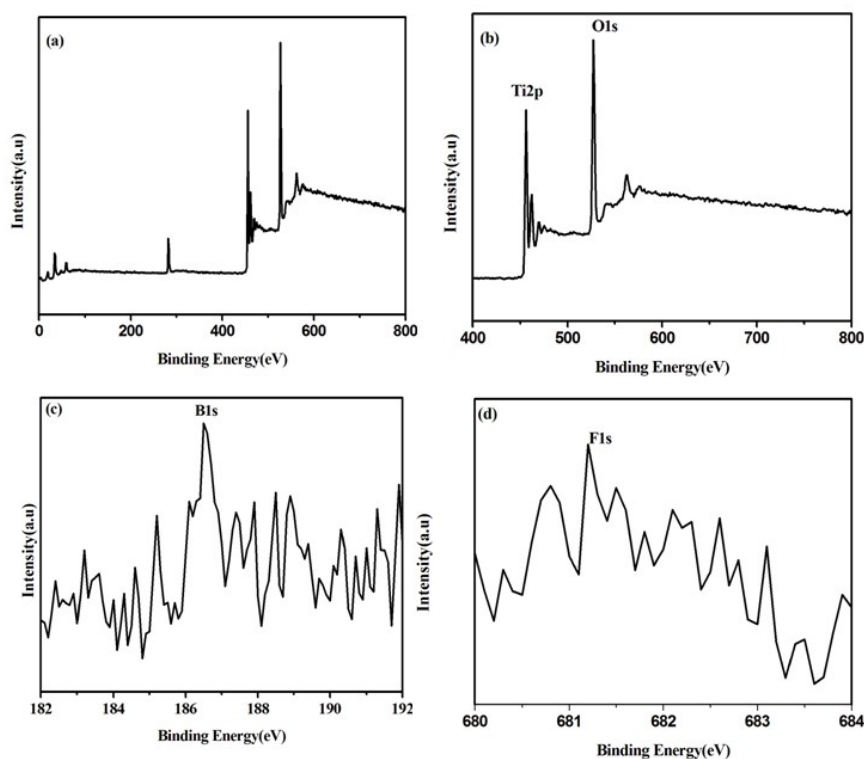

**Fig. 4.** XPS spectra of B-F- $\text{TiO}_2$  nanocomposite (a), Ti 2p peak and O 1s peak (b), B 1s peak (c), F 1s peak (d) in the composite

The binding energy peaks for F 1s were observed at 681.2 eV, both in good agreement with those reported for surface F species in  $\text{TiOF}_2$ <sup>56</sup>. The fact that only the Ti (2p) components display a variation, and not the O (1s) component, signifies that fluoride must be bonded to titanium forming an O-Ti-F fragment. The location of the boron species cannot be assigned from XPS analysis given its low concentration. Therefore, it indicates that an O-Ti-B-F bond structure may occur in the B, F co-doped anatase  $\text{TiO}_2$  film. It can be concluded that fluoride and boron have been actually incorporated into the  $\text{TiO}_2$  films by the method used in this study.

### 1.5 Schematic energy diagram

Schematic energy diagram was shown in Fig.5, the flat-band potential of the bare  $\text{TiO}_2$  and B/F co-doped  $\text{TiO}_2$  were determined to be -2.097 V and -2.2 V (vs. Ag/AgCl), respectively, clearly the open-circuit potential of the B/F co-doped electrode is negatively shifted by 103 mV compared with the undoped  $\text{TiO}_2$  electrode.

This negative movement of the flat-band edge can be due to a shift in the position of the conduction band edge of the nanocrystalline electrodes.

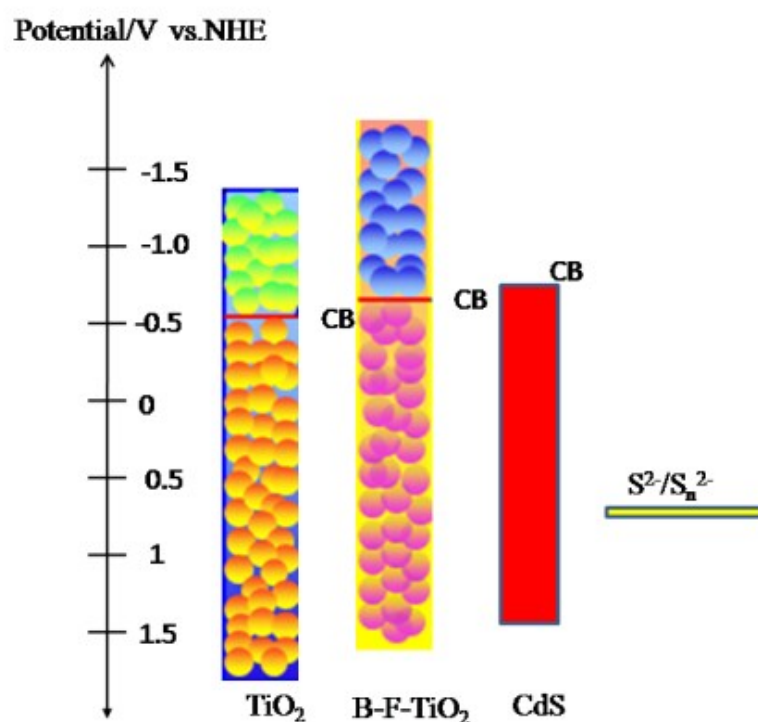

**Fig. 5.** Schematic energy diagram for QDSSCs based on the undoped TiO<sub>2</sub> electrode, B/F codoped TiO<sub>2</sub> electrode and a S<sup>2-</sup>/S<sub>n</sub><sup>2-</sup> redox electrolyte.

- [1] Q. Wang, J. Moser, M. Grätzel, *J. Phys. Chem. B*, 2005, **109**, 14945-14953.
- [2] D. Chen, D. Yang, Q. Wang, Z. Jiang, *Ind. Eng. Chem. Re*, 2006, **45**, 4110-4116.
- [3] N. Lu, X. Li, J. Y. Quan, S. Yu, H. T. Chen, G. H. Chen, *J. Phys. Chem. C*, 2007, **111**, 11836-11842.
- [4] G. Liu, Y. Zhao, C. Li, F. Lu, G. Sun, H. Cheng, *Angew. Chem. Int. Ed*, 2008, **47**, 4516-4520.
- [5] N. O. Lo, H. H. Gopal, S. C. Ke, *J. Am. Chem. Soc*, 2008, **130**, 2760-2761.
- [6] S. In, A. Orlov, R. Berg, F. Garca, S. P. Jimenez, M. S. Tikhov, D. S. Wright, R. M. Lambert, *J. Am. Chem. Soc*, 2007, **129**, 13790-13791.
- [7] W. Zhao, W. Ma, C. Chen, J. Zhao, Z. J. Shuai, *J. Am. Chem. Soc*, 2004, **126**, 4782-4783.

- [8] A. Zaleska, J. W. Sobczak, E. Grabowska, J. Hupka, *Appl. Catal, B*, 2008, **78**, 92-100.
- [9] A. Zaleska, E. Grabowska, J. W. Sobczak, M. Gazda, J. Hupka, *Appl. Catal. B*, 2009, **89**, 469-475.
- [10] Q. Ling, J. Sun, Q. Zhou, H. Ren, Q. Zhao, *Appl. Surf. Sci*, 2008, **254**, 6731-6735.
- [11] Y. Wei, S. Ni, C. Peng, *Acta. Energlae. Solaris. Sinica*, 2007, **28**, 621-625.
